# Supplementary material for: Comparative Bio-efficacy and Molecular Insights of North-Western Himalayan conifers, Cedrus deodara and Juniperus macropoda Essential Oils against two storage insect Pests
Source: Research Square preprint supplement (doi:10.21203/rs.3.rs-8096761/v1), 2025-12-01
Supplement: Supplementary file 1 [file b363522d017ff8682bd5ffc4.docx]

**Supplementary Data**

| **(a)** | **(b)** |
| --- | --- |
| **(c)** | **(d)** |
| **(e)** | **(f)** |

Figure S1: **Dose-dependent mortality (%) of test insects [(a) and (b) against *Tribolium castaneum* larvae; (c) and (d) against *T. castaneum* adults; (e) and (f) against *Callosobruchus maculatus* adults] exposed to essential oils of *Juniperus macropoda* and *Cedrus deodara*.** Bars represent mean mortality ± standard error. Different lowercase letters above bars indicate statistically significant differences between concentration treatments (p < 0.05) as determined by Tukey's HSD test. In order to homogenise the variance, mortality data was subjected to arcsine transformation before applying Tukey’s HSD test. Dotted lines represent the trend of increasing mortality with increasing essential oil concentrations.

Table S1: **Molecular interaction of selected receptor-ligand (EO component with target protein) complexes**

| **Insect species** | **Ligand** | **Protein** | **Interaction between** | **Distance (Å)** | **Bonding category** | **Type** | **Binding Energy (kcal/mol)** |
| --- | --- | --- | --- | --- | --- | --- | --- |
| *Tribolium casteneum* | *α*-(E)-atlantone | AChE | A:TYR345:HH - :UNK0:O | 2.62611 | Hydrogen Bond | Conventional Hydrogen Bond | -8.4 |
| A:TYR114 - :UNK0:C | 4.26644 | Hydrophobic | Pi-Alkyl |
| A:TYR114 - :UNK0:C | 4.38407 | Hydrophobic | Pi-Alkyl |
| A:TRP342 - :UNK0 | 4.98212 | Hydrophobic | Pi-Alkyl |
| A:TRP342 - :UNK0:C | 4.56282 | Hydrophobic | Pi-Alkyl |
| A:TRP342 - :UNK0 | 4.15815 | Hydrophobic | Pi-Alkyl |
| A:TRP342 - :UNK0:C | 5.06139 | Hydrophobic | Pi-Alkyl |
| A:TYR345 - :UNK0 | 4.95468 | Hydrophobic | Pi-Alkyl |
| A:TYR391 - :UNK0:C | 4.53556 | Hydrophobic | Pi-Alkyl |
| A:TYR391 - :UNK0:C | 4.74925 | Hydrophobic | Pi-Alkyl |
| A:PHE392 - :UNK0:C | 5.2834 | Hydrophobic | Pi-Alkyl |
| A:TYR395 - :UNK0:C | 4.01524 | Hydrophobic | Pi-Alkyl |
| *δ*-cadinene | AChE | :UNK0:C - A:TRP126 | 3.78615 | Hydrophobic | Pi-Sigma | -8.4 |
| :UNK0:C - A:TYR391 | 3.61587 | Hydrophobic | Pi-Sigma |
| A:TYR114 - :UNK0:C | 4.91519 | Hydrophobic | Pi-Alkyl |
| A:TRP126 - :UNK0 | 4.85207 | Hydrophobic | Pi-Alkyl |
| A:TRP126 - :UNK0 | 4.23668 | Hydrophobic | Pi-Alkyl |
| A:TRP126 - :UNK0:C | 5.03945 | Hydrophobic | Pi-Alkyl |
| A:TRP126 - :UNK0 | 4.52565 | Hydrophobic | Pi-Alkyl |
| A:TRP126 - :UNK0 | 3.93159 | Hydrophobic | Pi-Alkyl |
| A:TRP126 - :UNK0:C | 4.77073 | Hydrophobic | Pi-Alkyl |
| A:TRP126 - :UNK0:C | 4.25216 | Hydrophobic | Pi-Alkyl |
| A:TYR184 - :UNK0:C | 5.41653 | Hydrophobic | Pi-Alkyl |
| A:TYR391 - :UNK0 | 4.91192 | Hydrophobic | Pi-Alkyl |
| A:HIS502 - :UNK0 | 5.23992 | Hydrophobic | Pi-Alkyl |
| *α*-himachalene | OR | A:CYS145 - :UNK0 | 4.61325 | Hydrophobic | Alkyl | -8.0 |
| A:ALA212 - :UNK0 | 5.08101 | Hydrophobic | Alkyl |
| A:ALA212 - :UNK0:C | 3.91209 | Hydrophobic | Alkyl |
| A:ALA323 - :UNK0 | 5.09131 | Hydrophobic | Alkyl |
| A:ALA323 - :UNK0:C | 3.48278 | Hydrophobic | Alkyl |
| A:ALA323 - :UNK0:C | 3.75453 | Hydrophobic | Alkyl |
| :UNK0:C - A:CYS145 | 4.24889 | Hydrophobic | Alkyl |
| :UNK0:C - A:CYS145 | 3.71014 | Hydrophobic | Alkyl |
| :UNK0:C - A:ILE148 | 3.91406 | Hydrophobic | Alkyl |
| :UNK0:C - A:CYS149 | 4.72942 | Hydrophobic | Alkyl |
| A:HIS84 - :UNK0:C | 4.96097 | Hydrophobic | Pi-Alkyl |
| A:PHE141 - :UNK0:C | 5.40249 | Hydrophobic | Pi-Alkyl |
| A:TYR320 - :UNK0 | 4.75148 | Hydrophobic | Pi-Alkyl |
| A:TYR320 - :UNK0:C | 5.1466 | Hydrophobic | Pi-Alkyl |
| *δ*-cadinene | OR | :UNK0:C - A:TYR320 | 3.69239 | Hydrophobic | Pi-Sigma | -7.5 |
| A:CYS145 - :UNK0 | 5.02861 | Hydrophobic | Alkyl |
| A:ILE148 - :UNK0 | 4.61653 | Hydrophobic | Alkyl |
| A:ALA212 - :UNK0 | 4.81912 | Hydrophobic | Alkyl |
| A:ALA212 - :UNK0:C | 3.73297 | Hydrophobic | Alkyl |
| A:ILE215 - :UNK0 | 5.3315 | Hydrophobic | Alkyl |
| A:ALA323 - :UNK0 | 5.00598 | Hydrophobic | Alkyl |
| A:ALA323 - :UNK0:C | 4.12912 | Hydrophobic | Alkyl |
| A:ALA323 - :UNK0:C | 3.77847 | Hydrophobic | Alkyl |
| :UNK0:C - A:ILE148 | 3.69189 | Hydrophobic | Alkyl |
| A:TYR320 - :UNK0 | 4.35421 | Hydrophobic | Pi-Alkyl |
| *Callosobruchus maculatus* | *γ*-himachalene | AChE | :UNK0:C - A:TRP114 | 3.99328 | Hydrophobic | Pi-Sigma | -7.3 |
| :UNK0:C - A:TRP114 | 3.86602 | Hydrophobic | Pi-Sigma |
| A:TYR102 - :UNK0:C | 5.20543 | Hydrophobic | Pi-Alkyl |
| A:TRP114 - :UNK0:C | 5.03719 | Hydrophobic | Pi-Alkyl |
| A:TRP114 - :UNK0:C | 4.09379 | Hydrophobic | Pi-Alkyl |
| A:PHE326 - :UNK0:C | 4.86287 | Hydrophobic | Pi-Alkyl |
| A:PHE366 - :UNK0 | 5.14316 | Hydrophobic | Pi-Alkyl |
| A:PHE366 - :UNK0 | 5.28898 | Hydrophobic | Pi-Alkyl |
| A:PHE366 - :UNK0:C | 4.39628 | Hydrophobic | Pi-Alkyl |
| *δ*-cadinene | AChE | :UNK0:C - A:TYR102 | 3.84472 | Hydrophobic | Pi-Sigma | -7.5 |
| A:TYR102 - :UNK0:C | 3.67754 | Hydrophobic | Pi-Alkyl |
| A:TRP114 - :UNK0 | 5.43904 | Hydrophobic | Pi-Alkyl |
| A:PHE326 - :UNK0 | 5.39622 | Hydrophobic | Pi-Alkyl |
| A:PHE326 - :UNK0:C | 5.05907 | Hydrophobic | Pi-Alkyl |
| A:PHE366 - :UNK0 | 4.989 | Hydrophobic | Pi-Alkyl |
| A:PHE366 - :UNK0:C | 5.42608 | Hydrophobic | Pi-Alkyl |
| 3,5-diphenyl-1-pentene | OR | A:PHE328 - :UNK0 | 3.70851 | Hydrophobic | Pi-Pi Stacked | -7.7 |
| :UNK0 - A:ILE324 | 4.75535 | Hydrophobic | Alkyl |
| :UNK0:C - A:VAL338 | 4.50501 | Hydrophobic | Alkyl |
| A:PHE328 - :UNK0 | 4.64553 | Hydrophobic | Pi-Alkyl |
| :UNK0 - A:LEU231 | 5.16534 | Hydrophobic | Pi-Alkyl |
| *δ*-cadinene | OR | A:PHE328 - :UNK0 | 3.74035 | Hydrophobic | Pi-Alkyl | -6.6 |
| A:PHE328 - :UNK0 | 4.27733 | Hydrophobic | Pi-Alkyl |
| A:PHE328 - :UNK0:C | 4.55662 | Hydrophobic | Pi-Alkyl |
| A:PHE328 - :UNK0:C | 4.97751 | Hydrophobic | Pi-Alkyl |
| A:PHE328 - :UNK0:C | 4.85096 | Hydrophobic | Pi-Alkyl |

Note: Molecular docking and interaction analysis were conducted using AutoDock Vina (version 1.2.0) to predict the interaction modes and binding affinities (kcal/mol) of selected essential oil (EO) constituents with key insect receptor proteins. Interaction types were further visualised and classified using Discovery Studio Visualizer. The table lists key interacting amino acid residues, bond distance (Å) and the nature of interactions (hydrogen bind, hydrophobic, π–alkyl, π–π stacked, etc) between each ligand and active site residues of the respective receptor. For *T. castaneum*, the protein analysed included acetylcholine (Ache; UniProt ID: D6W9E2) and odorant receptor (OR; UniProt ID: C0z3Q0), while for C. maculatus, targets included AChE (UniProt: A0A343KPX7) and OR (UniProt ID; A0A7G9J0X7).
